# Supplementary material for: Association of Calcium and Phosphate Levels with Incident Chronic Kidney Disease in Patients with Hypoparathyroidism: A Retrospective Case-Control Study
Source: Hindawi journal article supplement (doi:10.1155/2022/6078881), 2022-11-02

A

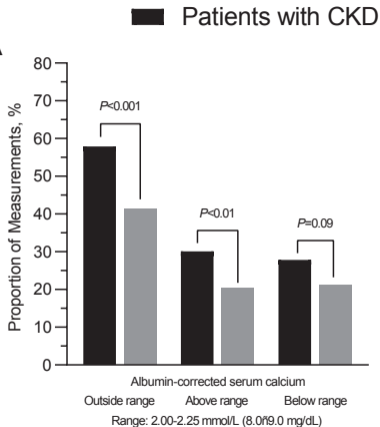

B

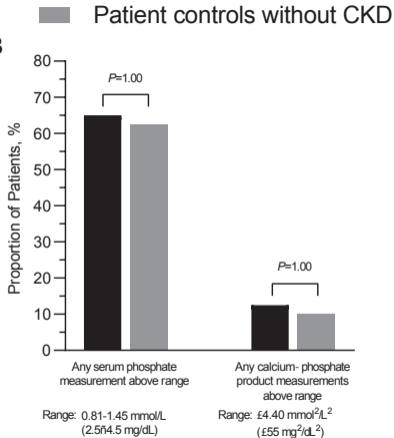

Supplement: f1 [file 6078881.f1.pdf]
